# Supplementary material
Source: publisher site journal article supplement (https://www.dovepress.com/get_supplementary_file.php?f=271795.docx)
Supplement: Supplementary file 1 [file get_supplementary_file.php]

**Supplementary materials**


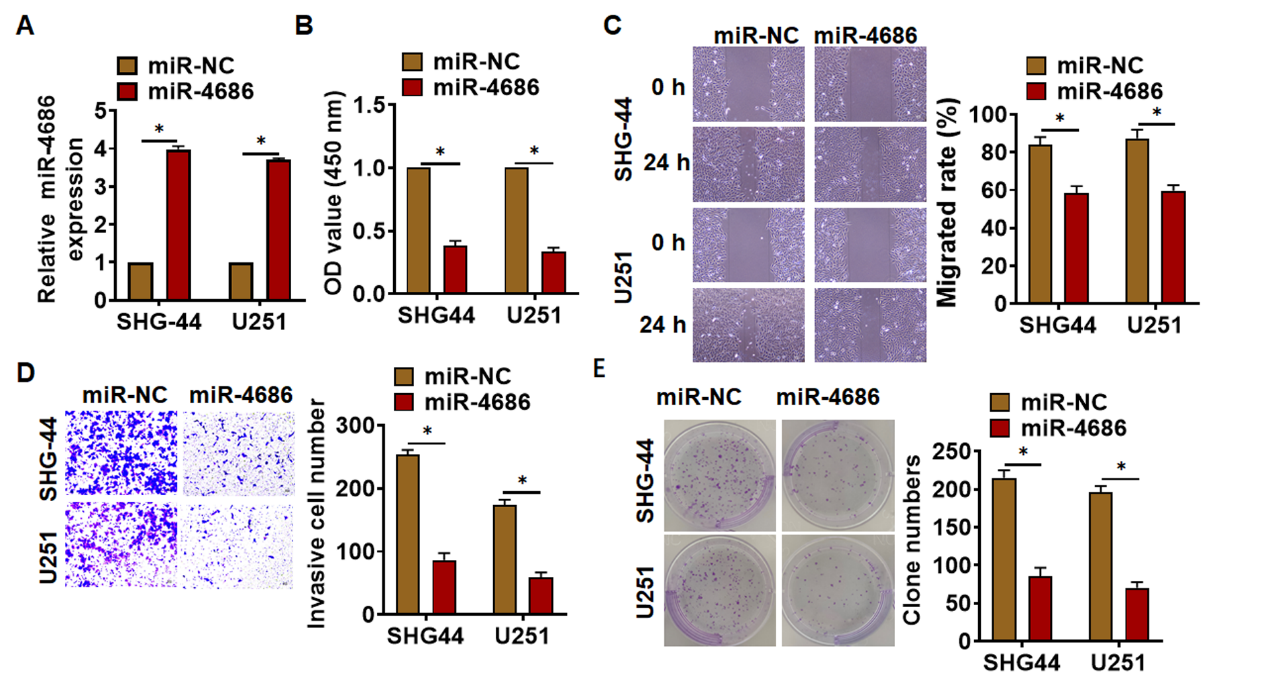
**Figure S1**

**Figure S1. MiR-4686 inhibited the proliferation, migration, and invasion of glioma cells.** MiR-NC and miR-4686 were transfected into SHG-44 and U251 cells. **A.** The expression of miR-4686 in SHG-44 and U251 cells was detected using qRT-PCR. **B.** MTT assay used testing cell viability. **C.** Cell migration was tested by wound healing assay. Scale bar, 100 μm. **D.** Cell invasion was determined by transwell assay. Scale bar, 50 μm. **E.** Cell proliferation was tested by Colony formation assay. Data are mean ± SD; *P < 0.05. Data among multiple groups were analyzed by one-way ANOVA, followed by a Tukey post hoc test. The experiment was repeated in triplicate.
